# Supplementary material for: Data-Driven Machine Learning Approach for Predicting the Higher Heating Value of Different Biomass Classes
Source: MDPI journal article supplement (doi:10.3390/cleantechnol4040075), 2022-11-22
Supplement: s1 [file s1]

**Table S1.** Memory parameters comparison between the ML algorithms.

| Memory parameters  | Random Forest                      | Decision Tree                   | ANN                               |
|--------------------|------------------------------------|---------------------------------|-----------------------------------|
| rss                | 272293888                          | 266756096                       | 156254208                         |
| Vms                | 635346944                          | 553603072                       | 632221696                         |
| Num_page_faults    | 459355                             | 116147                          | 388229                            |
| Peak_wset          | 361549824                          | 266760192                       | 361549824                         |
| wset               | 272293888                          | 266756096                       | 156254208                         |
| Peak_paged_pool    | 3023808                            | 3044504                         | 3023808                           |
| Paged_pool         | 2987704                            | 2983088                         | 2982248                           |
| Peak_nonpaged_pool | 265592                             | 251852                          | 262200                            |
| Non_paged_pool     | 263016                             | 251148                          | 260440                            |
| pagefile           | 635346944                          | 553603072                       | 632221696                         |
| Peak_pagefile      | 639692800                          | 553603072                       | 636522496                         |
| Private            | 635346944                          | 553603072                       | 632221696                         |
| Memory %           | 6.4896878987171736                 | 6.357607877553133               | 3.724695644873626                 |
| Cpu times          | user=103.390625,<br>system=22.3125 | user=6.96875,<br>system=7.84375 | user=38.5625,<br>system=18.671875 |
